# Supplementary material for: Public views of and reactions to the COVID-19 pandemic in England: a qualitative study with diverse ethnicities
Source: HighWire-hosted journal article supplement (doi:10.1136/bmjopen-2022-061027), 2022-08-01
Supplement: bmjopen-2022-061027supp002_data_supplement.pdf [file bmjopen-2022-061027supp002_data_supplement.pdf]

**Table 1.** Participant characteristics (n=100)

| <b>Self-reported ethnicity</b> | <b>%</b> |
|--------------------------------|----------|
| Asian                          | 58       |
| Bangladeshi                    | 16       |
| Chinese                        | 10       |
| Indian                         | 14       |
| Pakistani                      | 13       |
| Asian (detail not given)       | 2        |
| Sri Lankan                     | 2        |
| Vietnamese                     | 1        |
| Black                          | 15       |
| Black African                  | 9        |
| Black Caribbean                | 3        |
| Black (detail not given)       | 2        |
| Black British                  | 1        |
| Mixed                          | 2        |
| Indian/ Mauritian              | 2        |
| White                          | 20       |
| White British                  | 14       |
| Traveller                      | 4        |
| Lithuanian                     | 1        |
| Polish                         | 1        |
| Other                          | 5        |
| Arab                           | 2        |
| Latin American                 | 2        |
| Unknown                        | 1        |
| <hr/>                          |          |
| <b>Religion</b>                | <b>%</b> |
| Buddhist                       | 1        |
| Christian                      | 17       |
| Hindu                          | 7        |
| Jewish                         | 8        |
| Muslim                         | 33       |
| None                           | 17       |
| Sikh                           | 5        |
| Unknown                        | 12       |
| <hr/>                          |          |
| <b>Gender</b>                  | <b>%</b> |
| Female                         | 49       |
| Male                           | 50       |
| Unknown                        | 1        |
| <hr/>                          |          |
| <b>Age category</b>            | <b>%</b> |
| 18-29                          | 21       |
| 30-39                          | 30       |
| 40-49                          | 10       |
| 50-59                          | 13       |
| 60-69                          | 10       |
| 70-79                          | 3        |
| 80+                            | 2        |
| Unknown                        | 11       |
| <hr/>                          |          |
| <b>UK Region</b>               | <b>%</b> |
| East Midlands                  | 12       |
| London                         | 21       |
| N/A                            | 4        |
| North East                     | 16       |
| North West                     | 6        |
| South East                     | 5        |

---

|               |    |
|---------------|----|
| South West    | 8  |
| Unknown       | 10 |
| Wales         | 6  |
| West Midlands | 12 |

---
