# Supplementary material for: Public views of and reactions to the COVID-19 pandemic in England: a qualitative study with diverse ethnicities
Source: HighWire-hosted journal article supplement (doi:10.1136/bmjopen-2022-061027), 2022-08-01
Supplement: bmjopen-2022-061027supp003_data_supplement.pdf [file bmjopen-2022-061027supp003_data_supplement.pdf]

Centre Number: \_\_\_\_\_  
Participant Code: \_\_\_\_\_  
Date: \_\_\_\_\_

Version 9 – 25/06/20

## Interview schedule

All participants should have received a copy of the information form and consent form prior to the discussion. Ask all participants to confirm that they have received both and have electronically returned a signed consent form. Ask participants to also confirm on the recording that they are happy to continue with the discussion. Continue to read the paragraph below and allow for people to ask any questions.

### Introduction *[please read this to the interviewee before the interview takes place]*

My name is Leah Jones, and I am interviewing you on behalf of Public Health England. We are a government organisation that aim to protect and improve the nation's health and wellbeing. Knowing your experiences is very important because it means we can offer more support that is helpful in relation to COVID-19, among different groups in society such as different cultures, ages, faiths, religions etc that are living in England.

If you don't mind, the discussion will be recorded and I will take a few notes. The notes and the recording will be kept completely private, meaning no names or identifiable information that you mention in the recording will be used when it is typed up, meaning we will not use your name or any other information that could be used to identify you, having said that, you may want to stick to first names and avoid using identifiable information for the sake of the recording, but this is entirely your choice. Are you happy to go ahead with the discussion?

## Background Questions

Can I ask that we go around the group and introduce ourselves? It would be useful to know your name and whether you are first, second, third, fourth generation.

## COVID-19 questions, general

1. Tell me about your experiences of COVID-19. *(Environmental context and resources) Probe: Have you or someone you know had it,*
2. How has the COVID-19 pandemic made you feel? *(Emotion)*
3. How do you think your experience is different because you come from a BAME/minority ethnic background? *(Professional role and identity)*
4. Tell me about how the pandemic may have impacted on the support structures within your circles of friends and family. *(Social norms, Environmental context and resources) Probe: Have you been able to give/receive support in the way you normally would? How has it changed if at all?*
5. Is there anything you will do differently as a result of this pandemic? *Probe: hand washing, hygiene, self-care, GP visits, antibiotics, left-overs, medication, (Intentions)*

Centre Number: \_\_\_\_\_  
Participant Code: \_\_\_\_\_  
Date: \_\_\_\_\_

Version 9 – 25/06/20

### Self-care

1. Tell me about how you would self-care/look after yourself at home if you developed COVID-19 symptoms. *(Skills)*

### Health seeking

2. When would you seek a consultation with a healthcare professional if you suspect yourself of having COVID-19? *(Memory, attention and decision making)*
3. How important is it to you to consult with a healthcare professional if you suspect COVID-19 in yourself or a family member? *(Environmental context and resources)*
4. What would you expect to happen in a consultation for suspected COVID-19? *(Goals, beliefs about consequences)* Probe: *antibiotics, other medication, reassurance, advice etc.*

### Prevention

5. Tell me about any strategies you have used to try and prevent yourself from catching COVID-19. Probe: *hand washing, face coverings, not touching face, avoiding social situations* *(Skills)*
6. How confident are you that those strategies will/have worked? *(Beliefs about capabilities)*

### Vaccines

7. How optimistic are you that a vaccine will help solve the pandemic? *(optimism)*
8. How would you feel about being offered a vaccine for COVID-19 if and when one becomes available? *(Emotion)* *(Memory, attention and decision making)*
9. Tell me why you would or would not accept a COVID-19 vaccine. *(Intentions)*
  - a. Probe: Would cost influence your decision? *(Memory, attention and decision making)*
  - b. Would effectiveness influence your decision? e.g. if it only lasted a year or so?  
*(Memory, attention and decision making)*
10. Who do you think should receive the COVID-19 vaccine, and why? Probe: children, elderly, health workers, essential workers, all *(Professional role and identity)*
11. If you were willing to receive a vaccine, where would you be happy to receive the COVID-19 vaccine? E.g. Pharmacy, GP, hospital, schools, specialist vaccine sites. *(Environmental context and resources)*
  - a. Is there anywhere you wouldn't visit to receive a vaccine?

Centre Number: \_\_\_\_\_  
Participant Code: \_\_\_\_\_  
Date: \_\_\_\_\_

Version 9 – 25/06/20

## Testing

12. Have you received a test for COVID-19?
13. What are your thoughts on receiving an antibody test (Test to see if you've already had it)?  
*(Memory, attention and decision making)*
14. When would you like to receive a test? At the start of symptoms? After the illness?  
*(Environmental context and resources)*
15. Who do you think should be tested? Probe: children, elderly, health workers, essential workers, all *(Professional role and identity)*
16. Where would you be happy to receive a COVID-19 test? E.g. Pharmacy, GP, hospital, schools, specialist testing sites. *(Environmental context and resources)*
  - b. Is there anywhere you wouldn't visit to receive a test?

## Shielding/at risk groups

17. To what extent would you consider yourself at risk? *(Professional role and identity, beliefs about consequences)*
18. What do you think of the recent figures showing higher mortality rates among BAME groups?  
*(Beliefs about consequences) (Environmental context and resources)*
  - a. To what extent has this affected your behaviour? *(Memory, attention and decision making)*
19. Tell me about any experiences you have of family members at increased risk or are shielding.  
*(Environmental context and resources)*
20. How has this made you feel? *(Emotion)*
21. Have you done anything differently for those individuals? If so, what? *(Environmental context and resources)*
22. How easy or difficult have you found shielding? *(Beliefs about capabilities)*
23. What do you think will happen to those vulnerable groups now that lockdown is being eased?  
*(Beliefs about consequences)*

## Government messaging

24. What is your experience of the government health messages telling people what to do during this pandemics?

Centre Number: \_\_\_\_\_  
Participant Code: \_\_\_\_\_  
Date: \_\_\_\_\_

Version 9 – 25/06/20

- c. Is there anything that you've found difficult about understanding what to do during this pandemic? (*Memory, attention and decision making*) *probe: about specific messages: stay at home; keep safe; save the NHS. Stay alert; control the virus; save lives.*
  - d. Is there anything that you've found easy about understanding what to do during this pandemic? (*Memory, attention and decision making*) *probe: about specific messages: stay at home; keep safe; save the NHS. Stay alert; control the virus; save lives.*
25. If you need information about COVID-19, where would you go to get it? *Probe: Website? Family? Pharmacy? (Environmental context and resources)*

Interviewer to go through the different messages and discuss each one.

26. How easy or difficult have you found physical distancing? (*Beliefs about capabilities*)
27. How will you decide when to start seeing your friends and family again? *Probe: When the government says, practical reasons, when you want etc. (Memory, attention and decision making)*
28. Have you broken any of the guidelines issued by the government, if so, what did you do and why? (Re-assure participants of confidentiality and anonymity to ensure honest answers) (*Environmental context and resources*)

### Returning to work/schools

29. What are your thoughts on children going back to schools?
- c. Emotions: fear, worried, relieved, happy (*Emotion*)
  - d. Concerns: travel, anxiety, distancing in schools, hygiene (*Environmental context and resources*)
30. What are your thoughts on returning back to work, if applicable?
- e. Emotions: fear, worried, relieved, happy (*Emotion*)
  - f. Concerns: travel, risk, family, caring (*Environmental context and resources*)
31. Based on our discussions, what do you feel you need, moving forwards? *Probe: guidance, testing, vaccine, medication, (Environmental context and resources)*
